# Supplementary material
Source: HighWire-hosted journal article supplement (https://bmjopen.bmj.com/content/10/12/e037277)
Supplement: inline-supplementary-material-2 [file inline-supplementary-material-2.pdf]

## Supplementary file 2

### Semi Structured Interview Guide

#### Patients

1. Can you describe how you found out about the fact that you had diabetes?  
*(Probe: what symptoms had been noticed, what was patient's age, what was his/her reaction to the diagnosis)*
2. Please describe what all you did in terms of seeking care once you found out about your illness.  
*(Probe: where and when he/she sought care, whether care sought from places other than SN, any home management done and for how long)*
3. How long have you been suffering from diabetes and what have you learnt about its effects on your health?  
*(Probe: is he/she aware about importance of controlling blood sugar, healthy diet, exercise, regular health checks, the potential negative consequences of diabetes, and impacts on lifestyle)*
4. From whom/where have you learnt about your disease and how useful has this been?  
*(Probe: what he/she thinks about the nature of information given, was it easy to understand, difficult to follow, who provided the information, any reading material given, how useful was it)*
5. Can you describe how your health is now and what steps you are taking to protect yourself?  
*(Probe: how he/she feels about his/her health status, whether he/she comes for regular health checks, how often, any medication being taken, any changes in life style)*
6. Are there any specific health problems that you are facing as a result of diabetes?  
*(Probe: specifically any vision related problems, how/he she is managing this, what advice if any has been given by the health care professionals)*
7. What do you know about diabetic retinopathy?  
*(Probe: what information has been given, what has he/she understood from the information given about what all need to be done to protect his/her eyes, how important does he/she believe this is)*
8. Have you ever undergone screening for diabetic retinopathy, when was your last screen?  
*(Probe: regularity of screening, whether he/she comes regularly as required, what difficulties he she faces in undergoing this, what has been helpful in undergoing screening)*
9. What suggestions do you have to get patients to come regularly for diabetic retinopathy screening?  
*(Probe: how often is acceptable, where would be ideal, what could encourage patients to come regularly)*

## Semi Structured Interview Guide

### Health Care Providers

1. What categories of health professionals are available to care for patient with diabetes at your institution?  
(Probe: Primary care, physician/dietician, endocrinologist/Ophthalmologist, Ophthalmic trained nurse)
2. What health promotion and patient education strategies you use for diabetes patients?  
(Probe: Clinical services, supportive services at community level)
3. What will be your primary prevention and screening process you follow for Diabetic retinopathy?  
(Probe: Primary prevention: change in life style, diet, use of home monitoring like glucometer)  
(Probe: Screening for other conditions like nephropathy, neuropathy)
4. What type of informations are taken for DR patients?  
(Probe: Do you take history about other complications, about other treatment for eye and diabetes)
5. What will be the understanding about patient's behavior towards diabetes and DR?  
(Probe: patient understanding and acceptance of their illness poor compliance fear)
6. What information about individual patients are recorded specifically for DR patients?  
(Probe: Risk factors, complications, previous examination, treatments and follow-up)
7. What communication methods are followed currently to have follow-up eye examination?  
(Probe: Personal record books, text message such as reminders)
8. How are the interventions for people with DR financed?  
(Probe: Funds by govt, private insurance, out of pocket/NGO)
9. What is your opinion about follow-up of Diabetic retinopathy patient?  
(Probe: Are they coming regularly as advised, Do they come only if they have symptoms)
10. What reasons usually patient reports for the poor follow-up?  
(Probe: Financial problem, Travel, Long waiting time, have they taken any steps to reschedule it)
11. What strategies you feel would make a better follow-up for DR patients?  
(Probe: Concession, travel expense, reschedule appointments, free top up)
