# Supplementary material
Source: HighWire-hosted journal article supplement (https://bmjopen.bmj.com/content/10/12/e037277)
Supplement: inline-supplementary-material-3 [file inline-supplementary-material-3.pdf]

**Supplementary table 1****Patient and HCP characteristics**

| <b>Characteristics of Patients</b> | <b>n(%)</b> | <b>Characteristics of HCPs</b> | <b>n(%)</b> |
|------------------------------------|-------------|--------------------------------|-------------|
| <b>Gender</b>                      |             | <b>Gender</b>                  |             |
| Male                               | 8(53.3)     | Male                           | 3(37.5)     |
| Female                             | 7(46.7)     | Female                         | 5(62.5)     |
| <b>Age (years)</b>                 |             | <b>Age (years)</b>             |             |
| 50-60                              | 6(40)       | 30-40                          | 2(25)       |
| 61-70                              | 4(26.7)     | 41-50                          | 5(62.5)     |
| 71-80                              | 5(33.3)     | 51-60                          | -           |
| <b>Marital status</b>              |             | 61-70                          | 1(12.5)     |
| Married                            | 15(100)     | <b>Marital status</b>          |             |
| Single                             | -           | Married                        | 7(87.5)     |
| <b>Education level</b>             |             | Single                         | 1(12.5)     |
| Non-literate                       | 3(20)       | <b>Professional status</b>     |             |
| 5 yrs of school                    | 2(13.3)     | Ophthalmologist                | 5(62.5)     |
| 6 to 12 yrs of school              | 5(33.3)     | Diabetologist                  | 2(25)       |
| College and above                  | 5(33.3)     | Dietician                      | 1(12.5)     |
| <b>Occupation</b>                  |             |                                |             |
| House wife                         | 3(20)       |                                |             |
| Goldsmith                          | 1(6.6)      |                                |             |
| Weaver                             | 2(13.3)     |                                |             |
| Self employed                      | 1(6.6)      |                                |             |
| Retired                            | 6(40)       |                                |             |
| Security guard                     | 1(6.6)      |                                |             |
| Household worker                   | 1(6.6)      |                                |             |

Note: HCP, Health Care Provider
